***NUBBIN* and *JAGGED* define stamen and carpel shape in *Arabidopsis*****Jose R. Dinneny, Detlef Weigel and Martin F. Yanofsky** *Development* **133**, 1645-1655.

An error in Fig. 4 was not corrected before the article went to press.

Panel B should be labelled as wild type (WT) and panel C as *jag nub*. The legend should read:

Similar to wild type (A), *FIL* expression in stage 6 *jag nub* stamens (C) is observed throughout the abaxial half. Although the *FIL* expression domain is soon dwarfed by the proliferation of the microsporangia in wild type, in *jag nub* anthers, no microsporangia proliferation is apparent and the *FIL* expression domain extends towards the adaxial side (D).

The authors apologise to readers for this mistake.
